# Supplementary material for: Moderate Effects of Hypoxic Training at Low and Supramaximal Intensities on Skeletal Muscle Metabolic Gene Expression in Mice
Source: MDPI journal article supplement (doi:10.3390/metabo13101103), 2023-10-21
Supplement: s1 [file s1]

Supplementary Table S1. Primer sequences used for qRT-PCR

| Gene         | Forward sequence (5'-3')   | Reverse sequence (5'-3')    |
|--------------|----------------------------|-----------------------------|
| <i>18s</i>   | ACTTTTGGGGCCTTCGTGTC       | GCCCAGAGACTCATTCTTCTTG      |
| <i>Hif1a</i> | TCAAGTCAGCAACGTGGAAG       | TATCGAGGCTGTGTCTGACTG       |
| <i>Vegfa</i> | GTACCTCCACCATGCCAAGT       | GCATTACATCTGCTGTGCT         |
| <i>Gys1</i>  | GAGAACGCAGTGCTTTTCGA       | TCATCCCCTGTCACCTTCG         |
| <i>Glut4</i> | CTCTCAGGCATCAATGCTGTTTTCTA | CGAGACCAACGTGAAGACCGTATT    |
| <i>Hk2</i>   | GCTAGGAGCTACCACACACCCT     | ACTCGCCATGTTCTGTCCCATCC     |
| <i>Pfk</i>   | GGAGTGCGTGCAGGTGACCAAA     | ATCACGGCCACTGTGTGCAACC      |
| <i>Pkm1</i>  | CAG CCA AAG GGG ACT ATC CT | GAG GCT CGC ACA AGT TCT T   |
| <i>Mct1</i>  | TTGTCTGTCTGGTTGCGGCTTGATCG | GCCCAAGACCTCCAATAACACCAATGC |
| <i>Mct4</i>  | GCCACCTCAACGCCTGCTA        | TGTCGGGTACACCCATATCCTTA     |
| <i>Ldha</i>  | TGCCTACGAGGTGATCAAGCT      | GCACCCGCCTAAGGTTCTTC        |
| <i>Pdh</i>   | GAAGGCCCTGCATTCAACTTC      | ATAGGGACATCAGCACCAGTG A     |

|              |                          |                          |
|--------------|--------------------------|--------------------------|
| <i>Pdk4</i>  | TACTCCACTGCTCCAACACCTG   | AGCCATAACCAAAACCAGCCAAAG |
| <i>Pgc1a</i> | ACTATGAATCAAGCCACTACAGAC | TTCATCCCTCTTGAGCCTTTCG   |
| <i>Pgc1b</i> | GAGGAGTCCCTTCCTTCATC     | TCCTCGAAGGTTAAGGCTGA     |
| <i>Nrf1</i>  | GCACCTTTGGAGAATGTGGT     | CTGAGCCTGGGTCATTTTGT     |
| <i>Tfam</i>  | CCAAAAAGACCTCGTTCAGC     | CTTCAGCCATCTGCTCTTCC     |
| <i>Cs</i>    | GGACAATTTTCCAACCAATCTGC  | TCGGTTCATTCCCCTCTGCATA   |
| <i>mtNd1</i> | GCACCTACCCTATCACTCACA    | GTTTGGGCTACGGCTCG        |
| <i>mtNd6</i> | TACCCGCAAACAAAGATCACC    | ATGTTGGAAGGAGGGATTGGG    |
| <i>Cytc</i>  | CCAAATCTCCACGTTCTGTT     | GTCTGCCCTTTCTCCCTTCT     |
| <i>Cytb</i>  | ACGCAAACGGAGCCTCAATA     | CCTCATGGAAGGACGTAGCC     |
| <i>Cd36</i>  | ATGGGCTGTGATCGGAACTG     | GTCTTCCCAATAAGCATGTCTCC  |
| <i>Fapb3</i> | ACCTGGAAGCTAGTGGACAG     | TGATGGTAGTAGGCTTGGTCAT   |
| <i>Ucp2</i>  | GCTCAAGAACTAATCACAGCCA   | GGTGGGCTTATTCTACCATTG    |
| <i>Hsl</i>   | TTCCCTGTTGATGTGGTCAA     | CAGTGACCTGCGCTGTGGTA     |

|             |                            |                            |
|-------------|----------------------------|----------------------------|
| <i>Mcad</i> | GATCGCAATGGGTGCTTTTGATAGAA | AGCTGATTGGCAATGTCTCCAGCAAA |
|-------------|----------------------------|----------------------------|

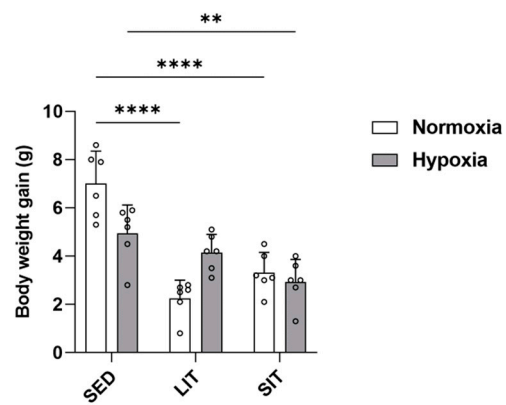

| Source of Variation  | % of total variation | <i>p</i> value |
|----------------------|----------------------|----------------|
| Interaction          | 20.22                | 0.0001         |
| Intervention         | 54.25                | <0.0001        |
| O <sub>2</sub> level | 0.2437               | 0.5947         |

Supplementary Figure S1. Body weight gain in normoxic and hypoxic SED, LIT and SIT mice. Asterisks represent significance as determined by a two-way ANOVA (\*\*  $p < 0.01$ ; \*\*\*\*  $p < 0.0001$ ).
